# Supplementary material for: Characterization of Synthetic Tf2 as a NaV1.3 Selective Pharmacological Probe
Source: PubMed Central journal article supplement (PMC7345637; doi:10.3390/biomedicines8060155), 2020-06-11
Supplement: biomedicines-08-00155-s001.pdf [file biomedicines-08-00155-s001.pdf]

Supplementary material:

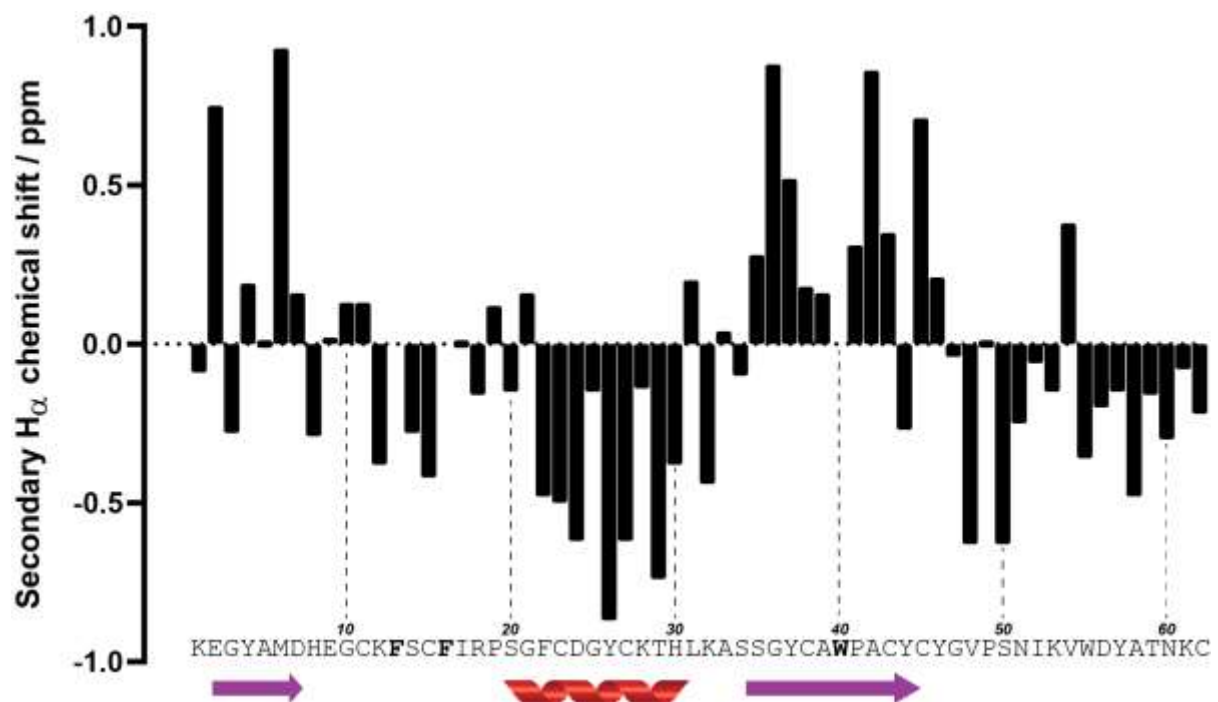

**Figure S1:** NMR secondary  $H_{\alpha}$  chemical shift analysis of synthetic Tf2. Chemical shifts of the H proton of each residue (except those highlighted in bold) were determined by sequential assignment of 2D-NOESY and TOCSY spectra and compared to random coil values [1]. Positive secondary H chemical shifts indicate  $\alpha$ -strand structure, whereas negative values indicate  $\alpha$ -helical structure.

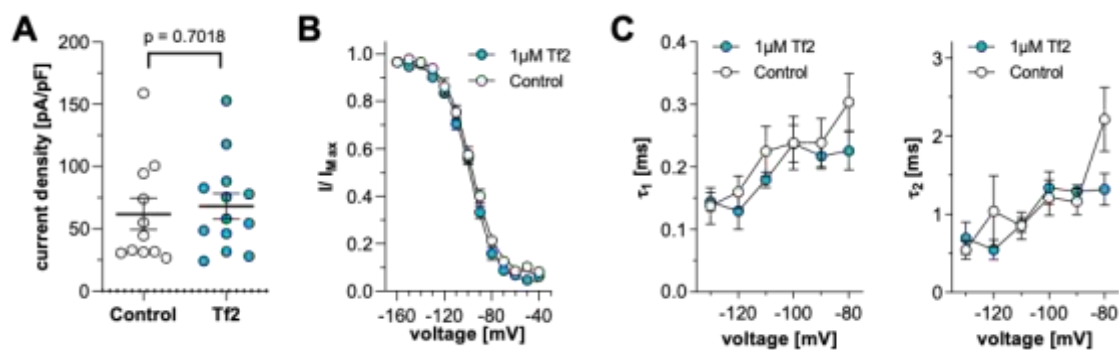

**Figure S2:** Activity of Tf2 on other channel parameters of hNav1.9\_C4. **(A)** Effect of Tf2 (1  $\mu$ M) (blue circles) on current density, compared to buffer control (0.1% BSA) (white circles). **(B)** Effect of Tf2 (1  $\mu$ M) (blue circles) on voltage-dependence of fast inactivation ( $n = 8-12$ ), compared to buffer control (0.1% BSA) (white circles) **(C)** Effect of Tf2 (1  $\mu$ M) (blue circles) on the current decay of deactivation ( $n = 6-12$ ), compared to buffer control (0.1% BSA) (white circles). Data are presented as mean  $\pm$  SEM.

**References:**

1. Wishart, D.S.; Bigam, C.G.; Holm, A.; Hodges, R.S.; Sykes, B.D.  $^1\text{H}$ ,  $^{13}\text{C}$  and  $^{15}\text{N}$  random coil NMR chemical shifts of the common amino acids. I. Investigations of nearest-neighbor effects. *Journal of biomolecular NMR* **1995**, *5*, 67-81, doi:10.1007/bf00227471.
